# Supplementary material
Source: Elsevier journal article supplement (https://www.sciencedirect.com/science/article/pii/S2254887422000558)
Supplement: mmc1 [file S2254887422000558:mmc1.pdf]

**Additional Material. Figure 1.** Distribution of the hospital stay of patients hospitalised in short-stay units (SSU) and patients who were hospitalised in other hospital services. Calculations are presented in duplicate, with (top) and presented in duplicate, with (top) and without (bottom) including patients who died during admission.

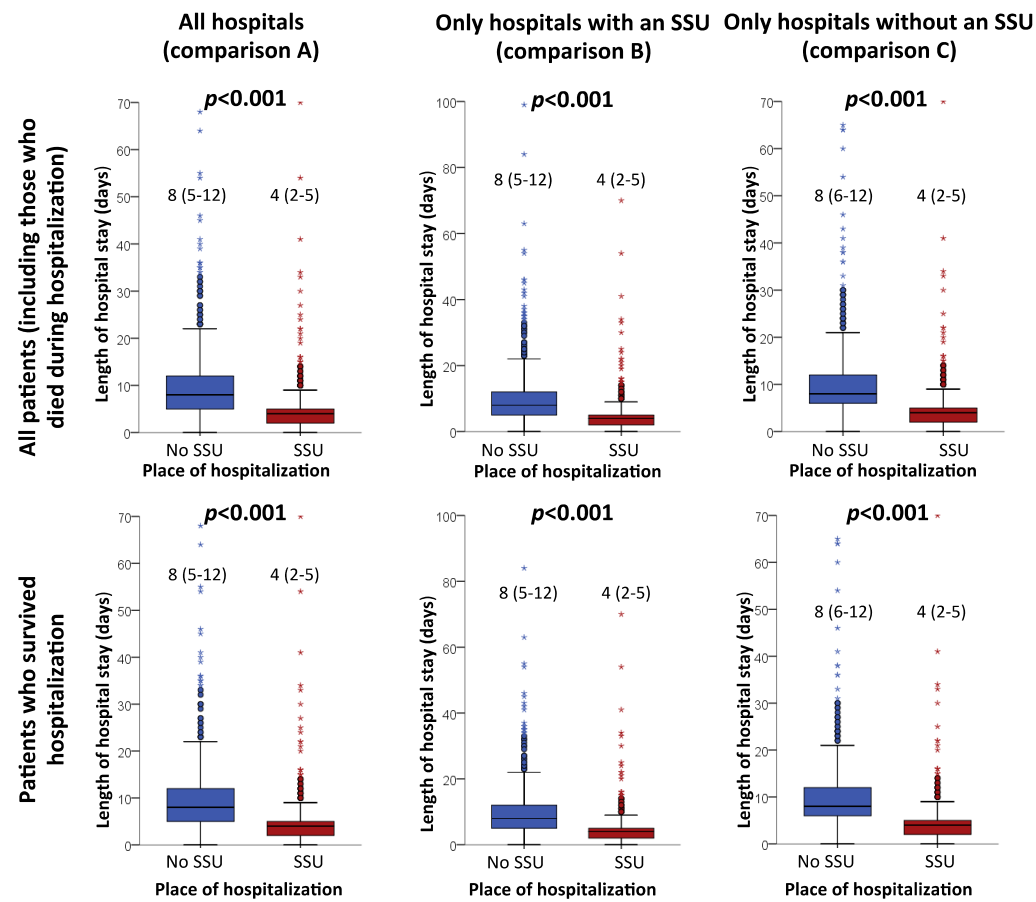

SSU: short-stay units.
